# Supplementary material for: CRI-HOM: A novel chemical mechanism for simulating highly oxygenated organic molecules (HOMs) in global chemistry–aerosol–climate models
Source: Copernicus journal article supplement (doi:10.5194/acp-20-10889-2020), 2020-09-22
Supplement: Supplementary file 1 [file acp-20-10889-2020-supplement.pdf]

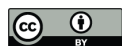

*Supplement of*

## **CRI-HOM: A novel chemical mechanism for simulating highly oxygenated organic molecules (HOMs) in global chemistry–aerosol–climate models**

**James Weber et al.**

*Correspondence to:* James Weber ([jmw240@cam.ac.uk](mailto:jmw240@cam.ac.uk))

The copyright of individual parts of the supplement might differ from the CC BY 4.0 License.

Table S1 - Summary of RO<sub>2</sub>-RO<sub>2</sub> rate coefficients

| Reaction                                                                                                              | Rate Coefficient / cm <sup>3</sup><br>molecules <sup>-1</sup> s <sup>-1</sup> | Reference                                    | Comments                                                                        |
|-----------------------------------------------------------------------------------------------------------------------|-------------------------------------------------------------------------------|----------------------------------------------|---------------------------------------------------------------------------------|
| All O3RO2 +<br>RO2 <sub>b</sub> =<br>0.5 C20d                                                                         | 0.97 - 3.6 × 10 <sup>-11</sup><br>(See full reaction list)                    | Berndt et al., 2018b                         | Derived from data from<br>Berndt et al., 2018b                                  |
| All OHRO2 +<br>RO2 <sub>b</sub> =<br>0.5 C20d                                                                         | 0.4 - 3.5 × 10 <sup>-11</sup><br>(See full reaction list)                     | Berndt et al., 2018b                         | Derived from data from<br>Berndt et al., 2018b                                  |
| All O3RO2 +<br>RO2 <sub>b</sub> =<br>C10x/CARB16                                                                      | 1.68 × 10 <sup>-12</sup>                                                      | Molteni et al., 2019                         |                                                                                 |
| All O3RO2 +<br>RO2 <sub>b</sub> =<br>Closed shell + peroxy<br>radical                                                 | 1.68 × 10 <sup>-12</sup>                                                      | Molteni et al., 2019<br>Jenkin et al., 2019a |                                                                                 |
| RN26BO2 +<br>RO2 <sub>m</sub> , RO2 <sub>s</sub> =<br>C10x/TNCARB26                                                   | 8.3 × 10 <sup>-13</sup>                                                       | Jenkin et al., 2019a*                        | Weighted average of rate<br>coefficients                                        |
| RTN28AO2 +<br>RO2 <sub>b</sub> , RO2 <sub>m</sub> , RO2 <sub>s</sub> =<br>Closed shell                                | 5.9 × 10 <sup>-13</sup>                                                       | MCM                                          | Weighted average of RO2<br>rate coefficients for species<br>APINAO2 and APINBO2 |
| RTN28BO2 +<br>RO2 <sub>m</sub> , RO2 <sub>s</sub> =<br>Closed shell + peroxy<br>radical                               | 6.70 × 10 <sup>-15</sup>                                                      | MCM                                          | MCM value for species<br>APINCO2                                                |
| 2nd – 5th gen O3RO2 +<br>RO2 <sub>m</sub> , RO2 <sub>s</sub> =<br>Closed shell + peroxy<br>radical                    | 5 × 10 <sup>-12</sup> – 1 × 10 <sup>-11</sup><br>(See full reaction list)     | Roldin et al., 2019                          | Increases with increasing<br>O3RO2 functionality                                |
| 2nd – 5th gen OHRO2 +<br>RO2 <sub>b</sub> , RO2 <sub>m</sub> , RO2 <sub>s</sub> =<br>Closed shell + peroxy<br>radical | 5 × 10 <sup>-12</sup> – 1 × 10 <sup>-11</sup><br>(See full reaction list)     | Roldin et al., 2019                          | Increases with increasing<br>OHRO2 functionality                                |
| All O3RO2 +<br>RO2 <sub>m</sub> =<br>C15d                                                                             | 3.9 - 7.5 × 10 <sup>-12</sup><br>(See full reaction list)                     | Berndt et al., 2018b                         | Based on Berndt et al, then<br>fitted to data                                   |

|                                           |                                                            |                      |                                               |
|-------------------------------------------|------------------------------------------------------------|----------------------|-----------------------------------------------|
| All OHRO2 +<br>RO2 <sub>m</sub> =<br>C15d | 1.8 - 3.75 × 10 <sup>-12</sup><br>(See full reaction list) | Berndt et al., 2018b | Based on Berndt et al, then<br>fitted to data |
|-------------------------------------------|------------------------------------------------------------|----------------------|-----------------------------------------------|

\* The rate coefficient for the production of the closed shell and alkoxy radical from reaction of the first generation O3RO2 species, RN26BO2, with RO2<sub>m</sub> and RO2<sub>s</sub> was taken to be the average of the rate coefficients of the three actual species (C107O2, C109O2 and C10BO2 using the notation of Molteni et al (2019)), weighted by the branching ratio of their production. The rate coefficients for C107O2, C109O2 and C10BO2 were calculated using the methodology of Jenkin et al (2019a).

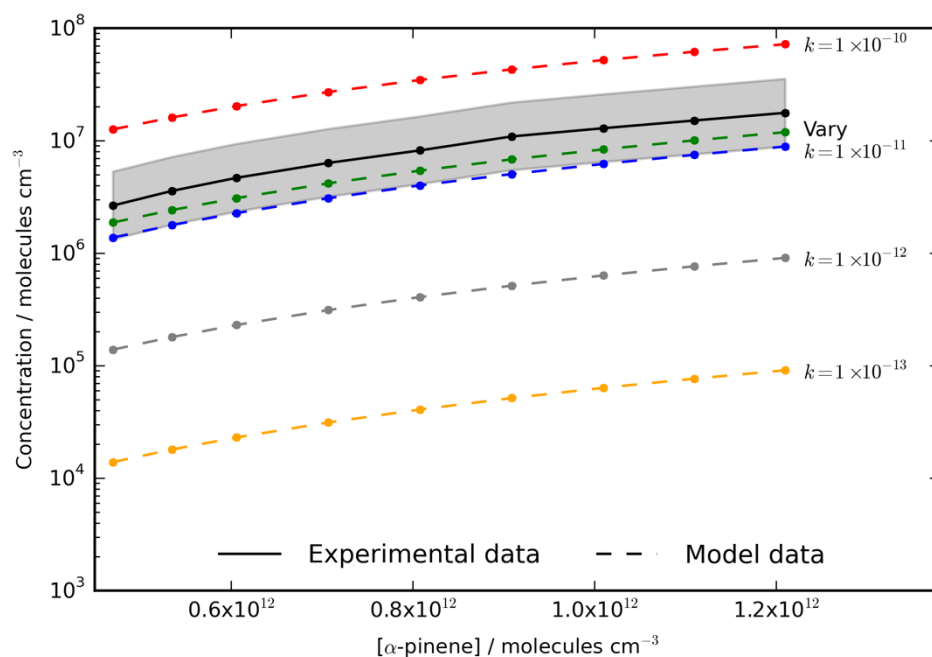

Figure S1 – Effect of C20d formation rate coefficient on model performance compared to observations from Berndt et al (2018b) under varying initial conditions of  $\alpha$ -pinene (Simulation A, Table 3). The model was able to reproduce observed concentrations within experimental error (shaded region) here and in Fig 5 when the rate coefficients were increased with increasing peroxy radical functionalisation (line marked “Vary”). The lines with  $k = 1 \times 10^{-10}$ ,  $1 \times 10^{-11}$ ,  $1 \times 10^{-12}$  and  $1 \times 10^{-13}$  show model performance when the specified rate coefficient (in units of  $\text{cm}^3 \text{ molecules}^{-1} \text{ s}^{-1}$ ) was used for all O3RO2 and OHRO2. The simulations with accretion formation rate coefficients suggested by Roldin et al (2019) ( $\sim 10^{-13}$ - $10^{-12} \text{ cm}^3 \text{ molecules}^{-1} \text{ s}^{-1}$ ) produced significantly lower C20d concentrations while using rate coefficients suggested by Molteni et al (2019) ( $\geq 10^{-10} \text{ cm}^3 \text{ molecules}^{-1} \text{ s}^{-1}$ ) overpredicted C20d concentrations.

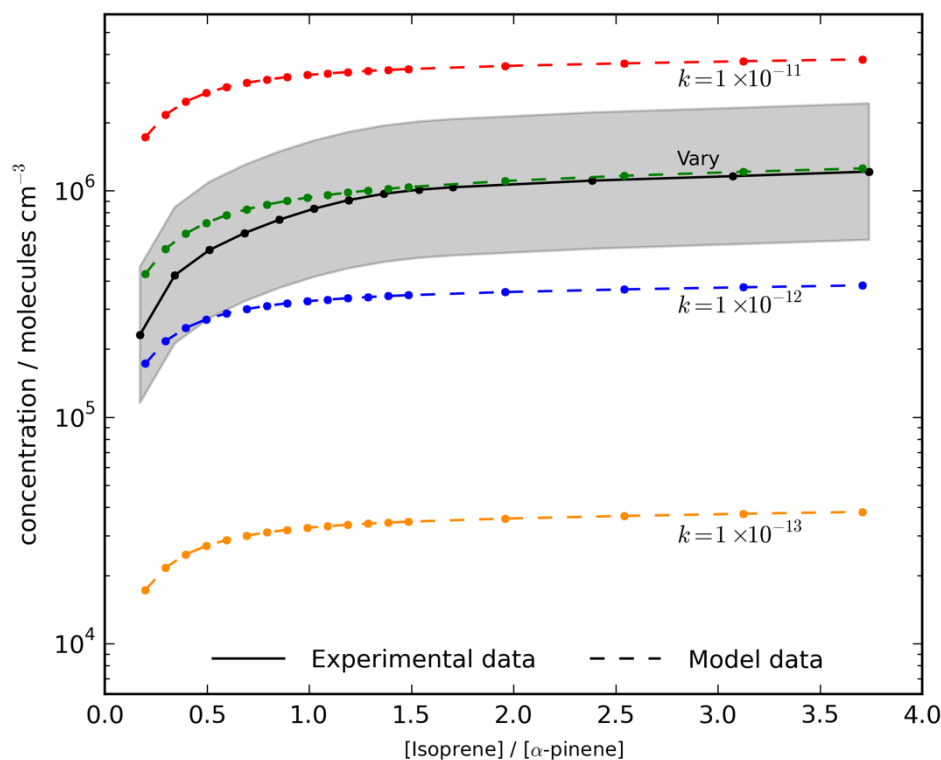

Figure S2 – Effect of C15d formation rate coefficient on model performance compared to observations from Berndt et al (2018b) under conditions of fixed initial  $\alpha$ -pinene concentration and varying initial isoprene concentration (Simulation B, Table 3). The model was able to replicate the general trend of increasing C15d with isoprene when the rate coefficients were increased with increasing peroxy radical functionalisation (line marked “Vary”), reproducing observation within experimental error (shaded region). The lines with  $k=1\times10^{-11}$ ,  $1\times10^{-12}$  and  $1\times10^{-13}$  show model performance when the specified rate coefficient (in units of  $\text{cm}^3 \text{molecules}^{-1} \text{s}^{-1}$ ) was used for all O3RO2 and OHRO2.

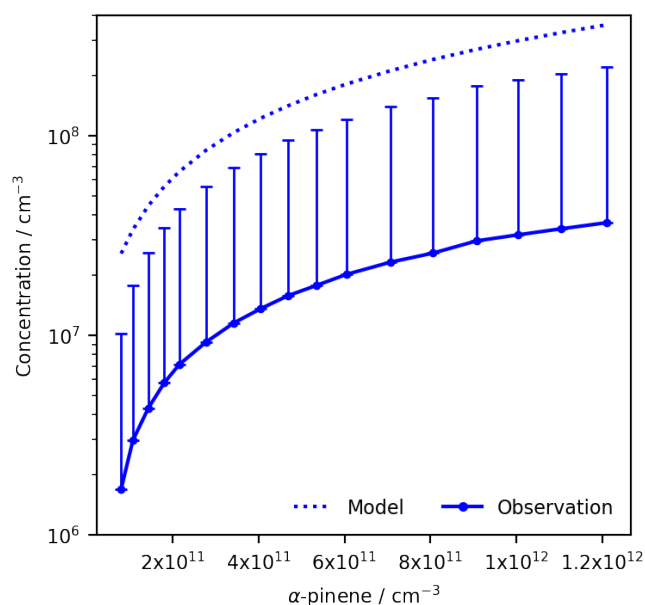

Figure S3 – 1<sup>st</sup> generation OHRO2 observation (Berndt et al., 2018b) and modelled with estimated experimental underprediction of factor of 5. Reasons for observation-model discrepancy are discussed in the main text.

Table S2 - Summary of HOM mechanisms and autoxidation activation energies

| Mechanism | Autoxidation Activation Energy / K | Comments |
|-----------|------------------------------------|----------|
|-----------|------------------------------------|----------|

|                      |                               |                                                                                        |
|----------------------|-------------------------------|----------------------------------------------------------------------------------------|
| HOM <sub>TI</sub>    | N/A - temperature independent | Autoxidation coefficients based on fitting from data from Berndt et al (2018b) at 297K |
| HOM <sub>6000</sub>  | 6000                          | Representing possible lower bound of activation energy                                 |
| HOM <sub>9000</sub>  | 9000                          | Representing possible middle value of activation energy                                |
| HOM <sub>12077</sub> | 12077                         | Value suggested by Roldin et al (2019)                                                 |

30

### HOM Yield Equations

The yields for 10-carbon HOMs from ozonolysis ( $\gamma_{C10z}$ ), OH oxidation ( $\gamma_{C10x}$ ) and the total HOM yield ( $\gamma_{total}$ ) are given by Eq. 1, Eq. 2 and Eq. 3 respectively.

35 
$$\gamma_{C10x} = \frac{[C10x](k_{OH+HOM}+CS+J)}{k_{OH}[OH][AP]} \quad (1)$$

$$\gamma_{C10z} = \frac{[C10z](k_{OH+HOM}+CS+J)}{k_{O_3}[O_3][AP]} \quad (2)$$

40 
$$\gamma_{total} = \frac{([C10z]+[C10x])(k_{OH+HOM}+CS+J)}{(k_{O_3}[O_3]+k_{OH}[OH])[AP]} \quad (3)$$

where  $[O_3]$ ,  $[OH]$ ,  $[C10z]$  and  $[C10x]$  are the concentrations of  $O_3$ , OH and the 10-carbon HOMs formed from ozonolysis and OH oxidation respectively,  $k_{OH+HOM}$  is the rate coefficient for the reactions of HOMs with OH,  $CS$  is the HOM condensation sink,  $J$  is the HOM photolysis frequency and  $k_{O_3}$  and  $k_{OH}$  are the reaction rate coefficients of  $\alpha$ -pinene with  $O_3$  and OH respectively.

45

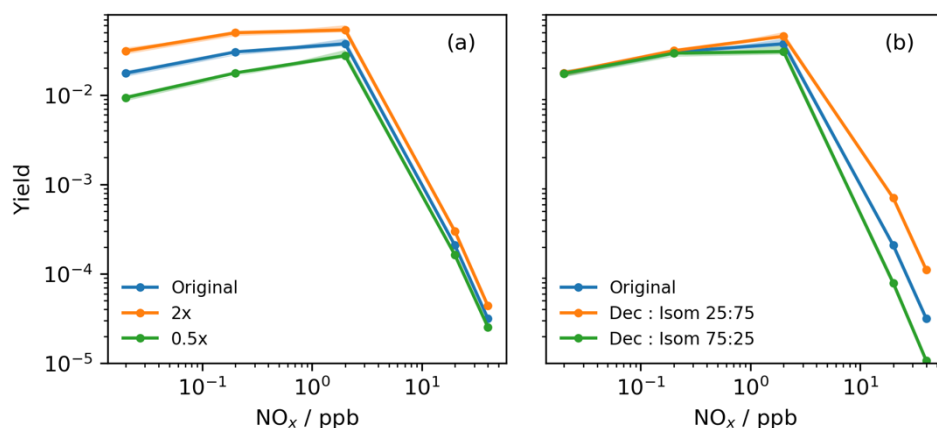

50 **Figure S4 – Modelled HOM yield at 290 K showing with (a) scaling of  $k_{14}$ ,  $k_{15}$  rate coefficients and (b) perturbations of the alkoxy decomposition-isomerisation branching ratio (originally 50:50).**

### Comparison to CRI v2.2

The new mechanism and the CRI v2.2 were run in a box model (Simulation D, Table 3) for 8 days with varying temperature (298 K average, amplitude of 4 K) and emissions of isoprene and  $\alpha$ -pinene varying sinusoidally (Fig S3). Time-independent base NO emissions of  $4.7 \times 10^9$  molecules  $\text{m}^{-2} \text{s}^{-1}$  were used with scaling factors of 1, 3, 10, 30, 100 and 200 employed in a manner consistent with Jenkin et al (2015). Time dependent isoprene emissions reached a maximum of  $1.1 \times 10^{12}$  molecules  $\text{m}^{-2} \text{s}^{-1}$  at 13:00 local time and had an average of  $7.1 \times 10^{11}$  molecules  $\text{m}^{-2} \text{s}^{-1}$  over the period 06:00 to 18:00, similar to emissions used in Jenkin et al (2015) and Bates et al (2019). Time dependent base  $\alpha$ -pinene emissions with a mean of  $3.23 \times 10^9$  molecules  $\text{m}^{-2} \text{s}^{-1}$  and maximum of  $5.30 \times 10^9$  molecules  $\text{m}^{-2} \text{s}^{-1}$  at 1500 hours were applied. Further runs were performed with  $\alpha$ -pinene emissions scaled by factors of  $10^{-3}$ ,  $10^{-2}$ , 0.1, 0.2, 0.5, 1, 2, 3 and 5 to investigate the model's performance. Initial conditions of  $\text{CH}_4$  (1.8 ppm), CO (100 ppb),  $\text{O}_3$  (20 ppb) and HCHO (300 ppt) were applied.

Photolysis frequencies simulating conditions at the equator also varied in the diurnal cycle. The box model simulated an instantaneously well-mixed planetary boundary with mixing with the free troposphere (with same composition of initial conditions) represented by the box height increasing from 250 m at night to 1500 m at midday before collapsing back to 250 m at 2100 hours.

The “concentration” of a species was taken to be the mean daytime concentration on the 8<sup>th</sup> day, the metric used by Jenkin et al (2015) and Bates et al (2019). The performance of all the HOM mechanisms (HOM<sub>TL</sub>, HOM<sub>6000</sub>, HOM<sub>9000</sub> and HOM<sub>12077</sub>) was compared to the CRI v2.2.

The HOM mechanisms matched the CRI extremely well for OH,  $\text{O}_3$ , NO,  $\text{NO}_2$ ,  $\text{HO}_2$ ,  $\alpha$ -pinene and isoprene as well as the hydroperoxides and nitrates derived from isoprene, methyl vinyl ketone and methacrolein, and the important SOA precursor isoprene epoxy diol (IEPOX)).

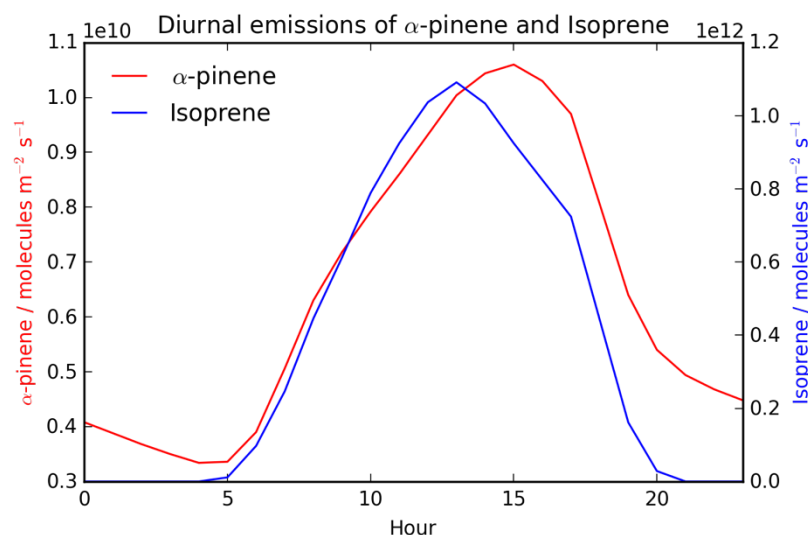

Figure S5 - Diurnal cycle of emissions of  $\alpha$ -pinene and isoprene for 8-day comparison of CRI v2.2 R5 with HOM mechanism versions.

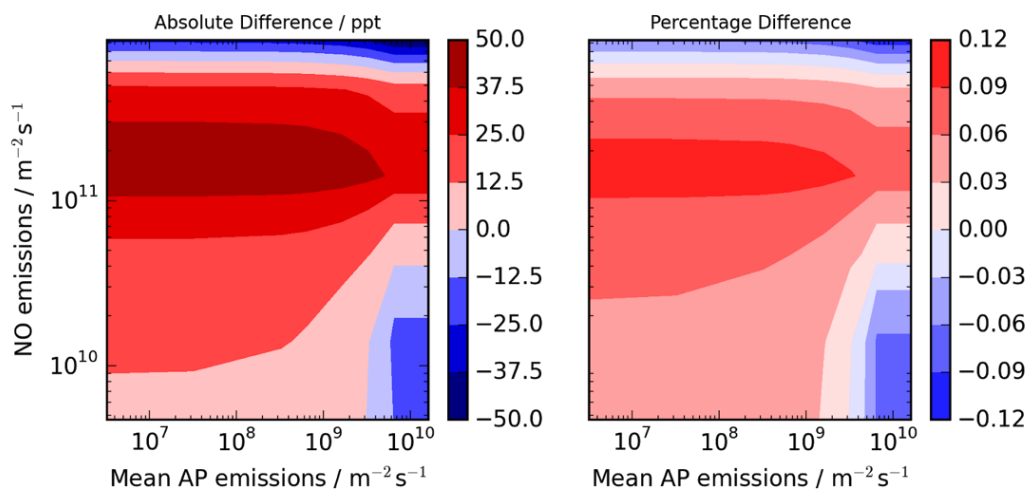

80 **Figure S6 - Absolute and percentage difference in 8<sup>th</sup> day daylight mean O<sub>3</sub> between the CRI v2.2 R5 and the HOM<sub>9000</sub> mechanism. The difference between mechanisms is less than  $\pm 0.05$  ppb.**

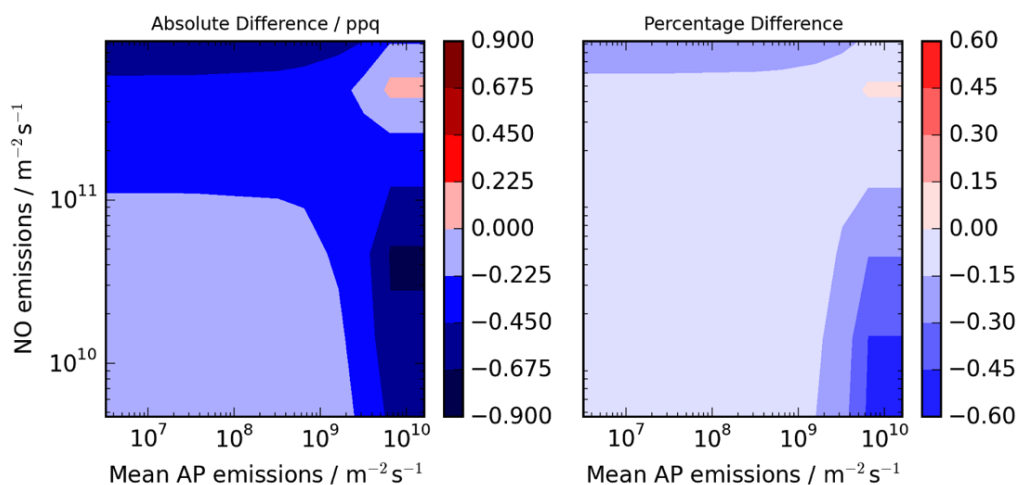

85 **Figure S7 - Absolute and percentage difference in 8<sup>th</sup> day daylight mean OH between the CRI v2.2 R5 and the HOM<sub>9000</sub> mechanism. The difference between mechanisms is less than  $\pm 0.3\%$  for the vast majority of the emissions space with the difference exceeding this only under very high emissions of  $\alpha$ -pinene.**

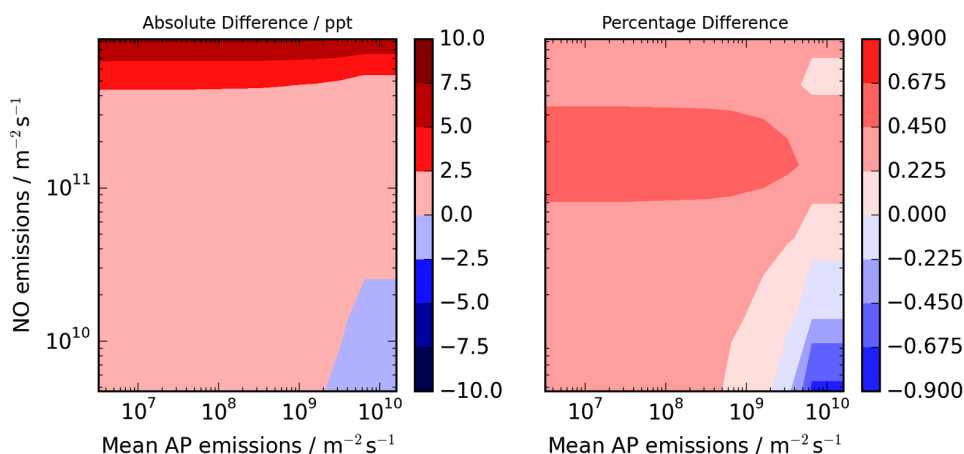

90 **Figure S8 - Absolute difference in 8<sup>th</sup> day daylight mean NO between the CRI v2.2 R5 and the HOM<sub>9000</sub> mechanism. The difference between mechanisms is less than  $\pm 2.5$  ppt for the vast majority of the emissions space with the difference exceeding this only under very high emissions of NO and  $\alpha$ -pinene.**

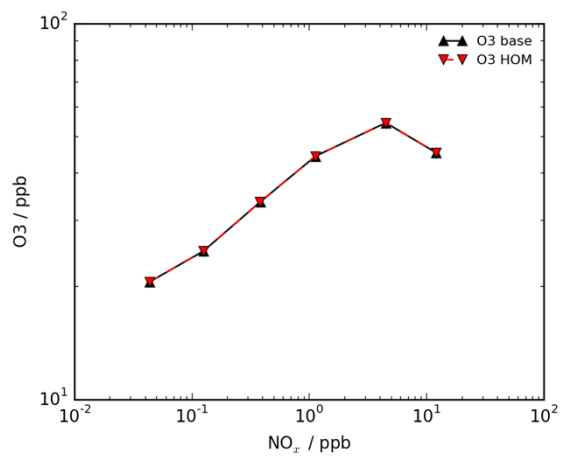

95 **Figure S9 - 8th day daylight mean O<sub>3</sub> in CRI v2.2 R5 and HOM<sub>9000</sub> model**

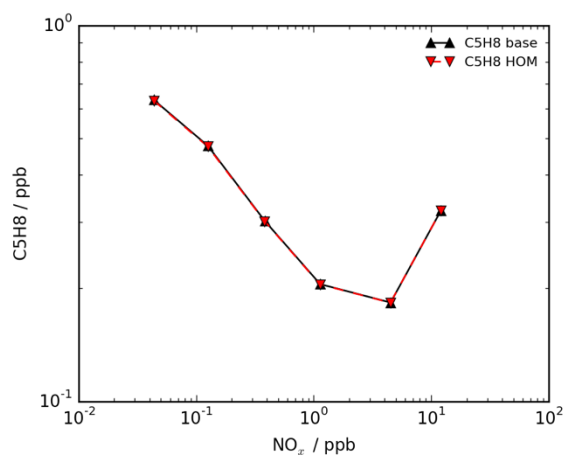

**Figure S10 - 8th day daylight mean isoprene in CRI v2.2 R5 and HOM<sub>9000</sub> model**

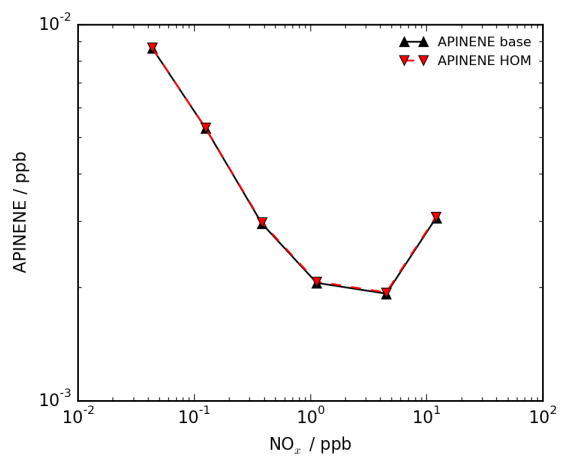

**Figure S11 - 8th day daylight mean  $\alpha$ -pinene in CRI v2.2 R5 and HOM<sub>9000</sub> model**



100

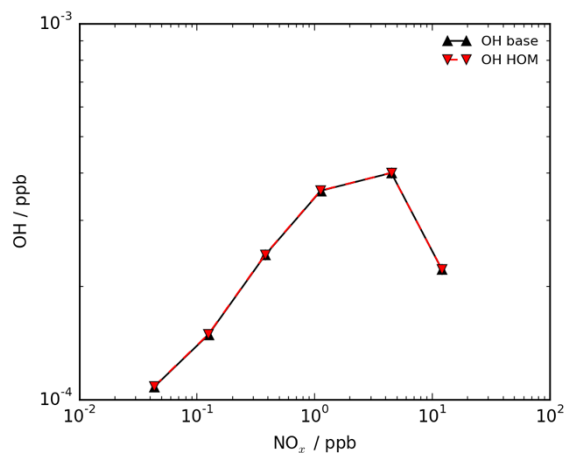

Figure S12 - 8th day daylight mean OH in CRI v2.2 R5 and HOM<sub>9000</sub> model

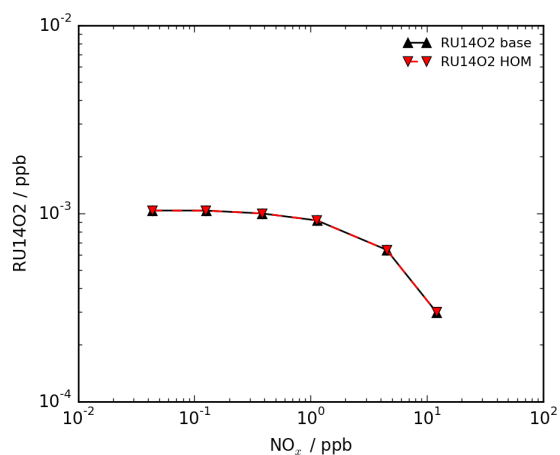

Figure S13 - 8th day daylight mean 1st generation isoprene peroxy radical in CRI v2.2 R5 and HOM<sub>9000</sub> model

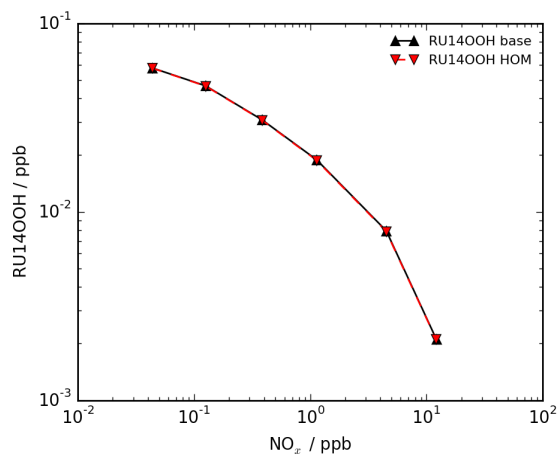

105 Figure S14 - 8th day daylight mean 1st generation isoprene hydroperoxide in CRI v2.2 R5 and HOM<sub>9000</sub> model

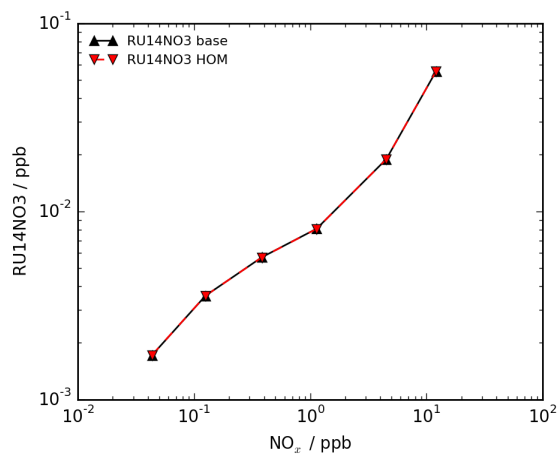

Figure S15 - 8th day daylight mean 1st generation isoprene nitrate in CRI v2.2 R5 and HOM<sub>9000</sub> model

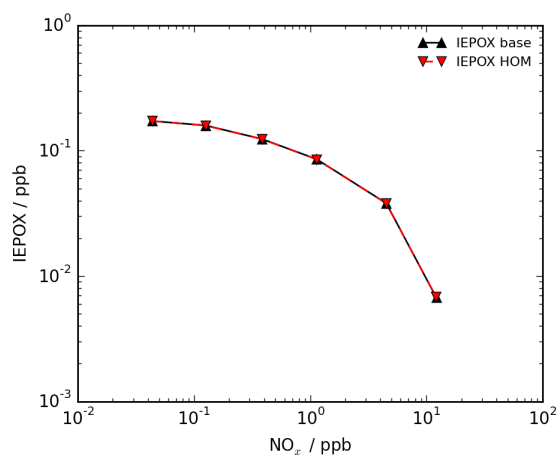

Figure S16 - 8th day daylight mean isoprene epoxydiol in CRI v2.2 R5 and HOM<sub>9000</sub> model

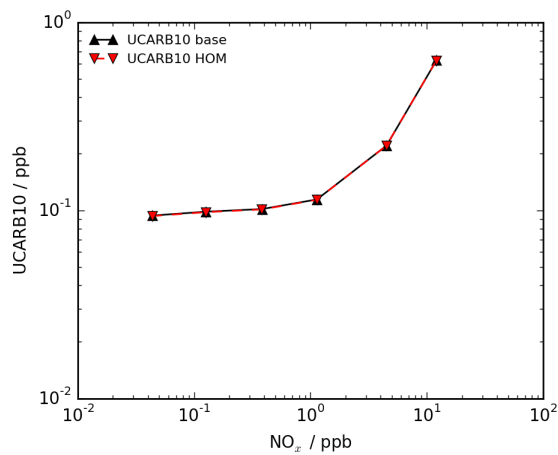

Figure S17 - 8th day daylight mean combined methyl vinyl ketone and methacrolein in CRI v2.2 R5 and HOM<sub>9000</sub> model

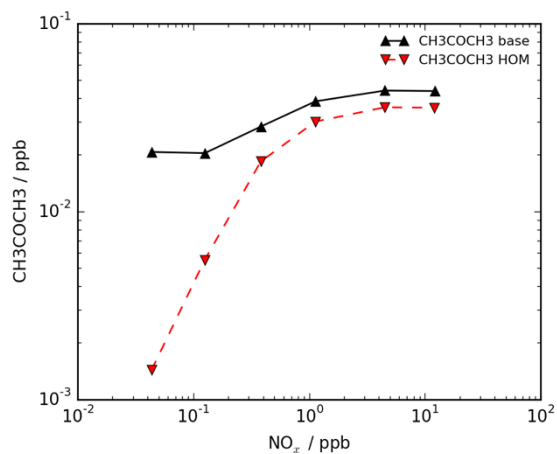

Figure S18 - 8th day daylight mean combined acetone in CRI v2.2 R5 and HOM<sub>9000</sub> model. The difference was attributed to the added competition supplied by the autoxidation pathways, diverting the degradation of  $\alpha$ -pinene away from the traditional pathways which form acetone. However, this discrepancy between mechanisms did not led to significant disagreement between the HOM mechanism and CRI v2.2 R5 for O<sub>3</sub> and OH concentrations.

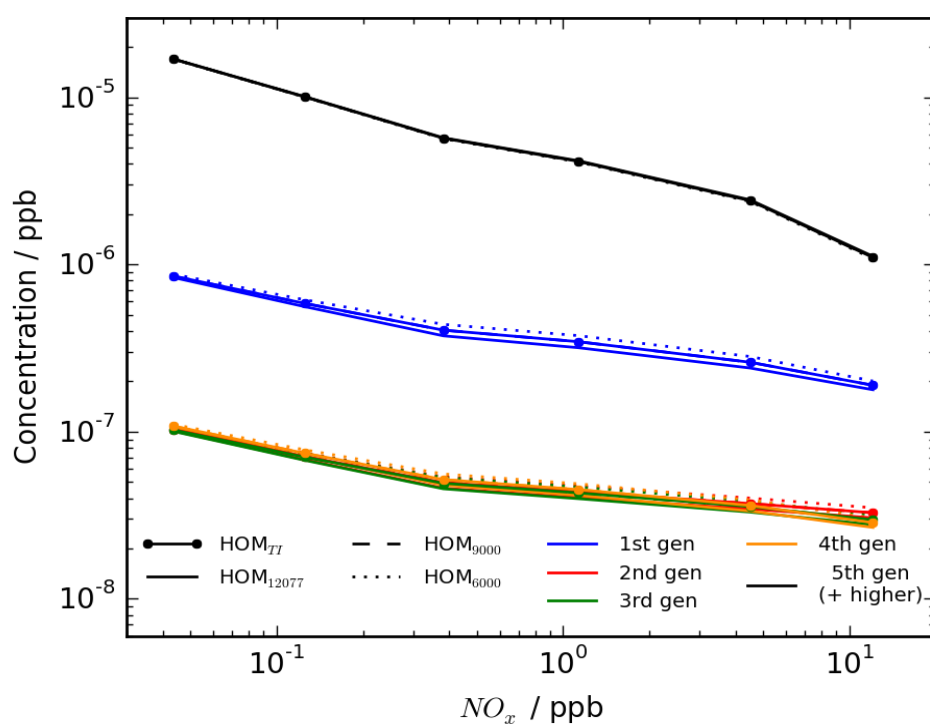

Figure S19 – Peroxy radicals from ozonolysis (O3RO2) exhibiting a decrease with NO<sub>x</sub> and the clear dominance of the highest generation peroxy radical. Negligible difference is observed between the 4 HOM mechanisms for each peroxy radical.

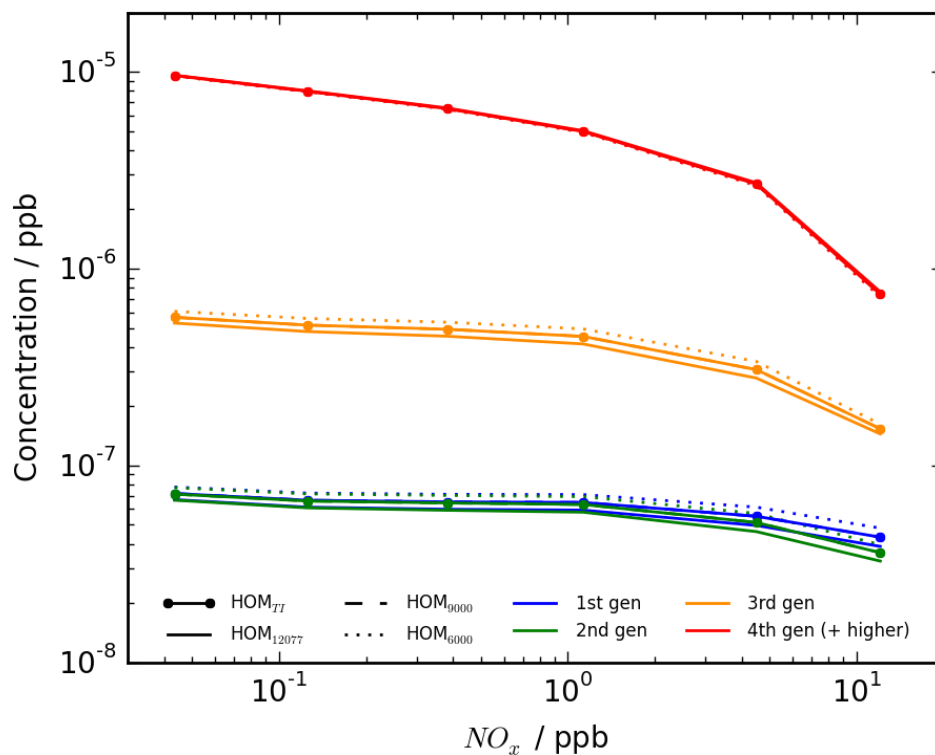

Figure S20 – Peroxy radicals from OH oxidation (OHRO2) exhibiting a decrease with  $\text{NO}_x$  and the clear dominance of the highest generation peroxy radical. Negligible difference is observed between the 4 HOM mechanisms for each peroxy radical.

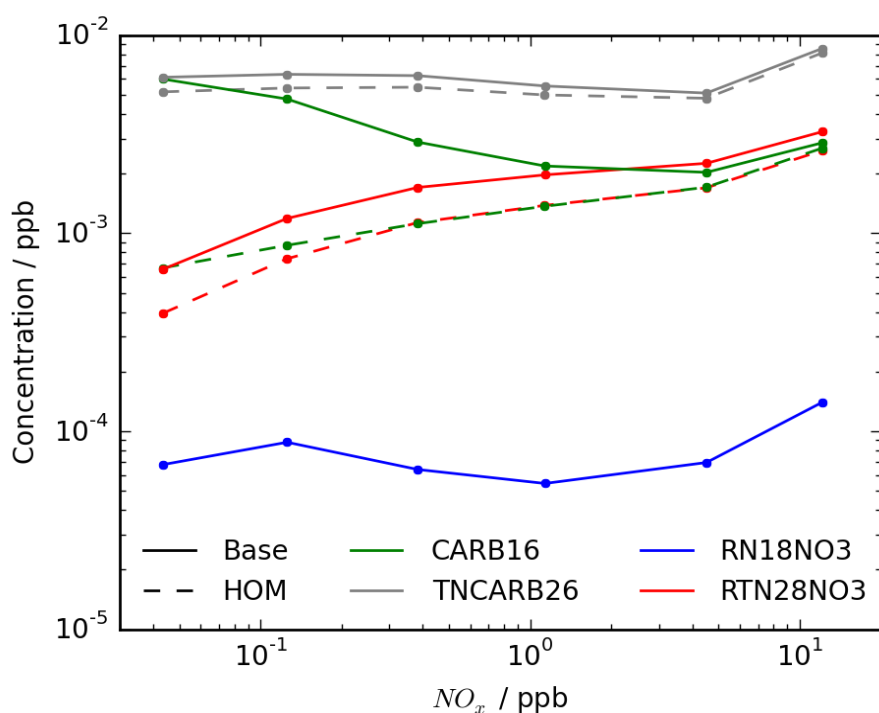

Figure S21 – Closed shell species in base mechanism compared to  $\text{HOM}_{\text{TI}}$  mechanism. The lower concentrations of TNCARB26, CARB16 and RTN28NO3 were attributed to the increased competition from the autoxidation pathways in the HOM mechanism. RN18NO3 was significantly lower in the HOM mechanisms (not shown) as discussed in the main text.

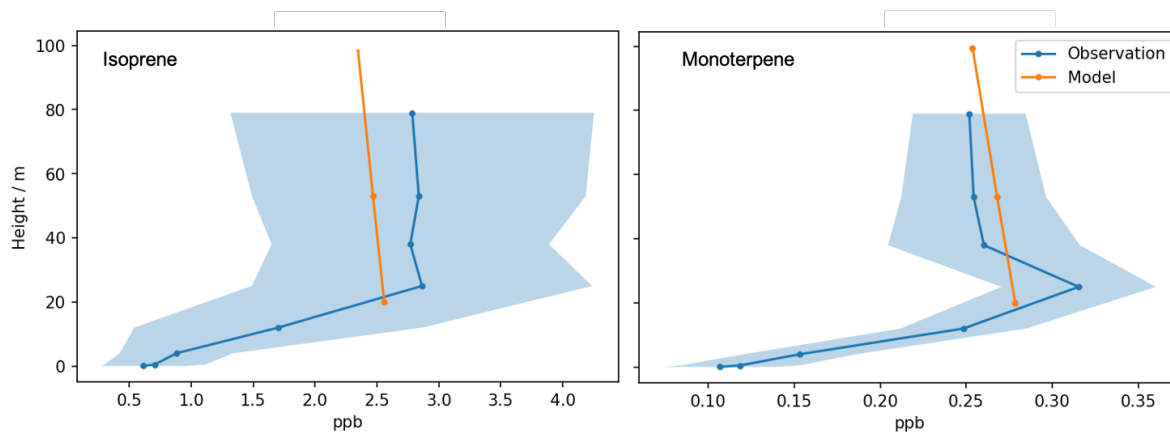

140 **Figure S22 – Observed concentrations of isoprene (left) and monoterpene (right) at the ATTO tower at 1:30-2:30 pm in June 2013 (Yáñez-Serrano et al., 2015) (shading shows standard deviation of observational data) and modelled concentrations of species.**

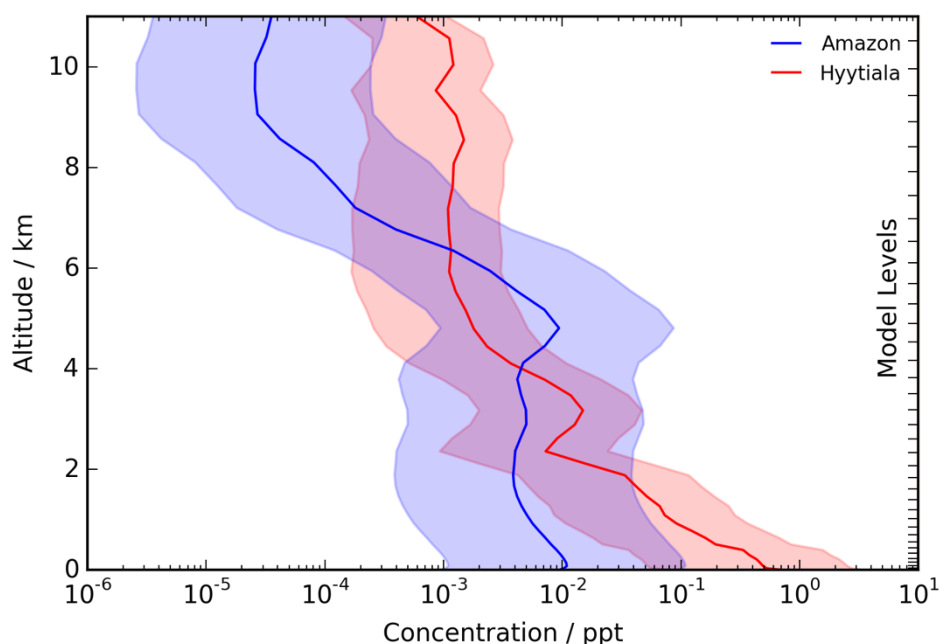

**Figure S23 – Total HOM concentrations in Amazon and Hyytiälä with shaded region showing the effect of increasing/decreasing CS by a factor of 10. The value of the CS has a significant influence on HOM concentrations.**

**Table S3 – Species and physical parameters used in the HOM altitude profile modelling. Note that for nucleation calculations, the same input species and parameters were used but all data were monthly means.**

| Data from UKCA run<br>(2pm 16th June, averaged over 2010-2104)                                                                                                                     | Data from UKESM Historical                                                                                                                                                                                                                                                                                                                                                                                                                                                                                                                                                                                                               |
|------------------------------------------------------------------------------------------------------------------------------------------------------------------------------------|------------------------------------------------------------------------------------------------------------------------------------------------------------------------------------------------------------------------------------------------------------------------------------------------------------------------------------------------------------------------------------------------------------------------------------------------------------------------------------------------------------------------------------------------------------------------------------------------------------------------------------------|
| Temperature, pressure, O <sub>3</sub> , OH, isoprene, monoterpene*, NO, NO <sub>2</sub> , NO <sub>3</sub> , N <sub>2</sub> O <sub>5</sub> , CO, HO <sub>2</sub> , H <sub>2</sub> O | CH <sub>4</sub> , CO, HCHO, CH <sub>3</sub> O <sub>2</sub> , C <sub>2</sub> H <sub>5</sub> O <sub>2</sub> , isoprene nitrate and hydroperoxides, H <sub>2</sub> O <sub>2</sub> , CH <sub>3</sub> OOH, HONO, C <sub>2</sub> H <sub>6</sub> , C <sub>2</sub> H <sub>5</sub> OOH, CH <sub>3</sub> CHO, PAN, C <sub>3</sub> H <sub>8</sub> , C <sub>3</sub> H <sub>7</sub> OOH, C <sub>2</sub> H <sub>5</sub> CHO, CH <sub>3</sub> NO <sub>3</sub> , Methacrolein, Methylglyoxal, HCOOH, CH <sub>3</sub> CO <sub>3</sub> , C <sub>3</sub> H <sub>7</sub> O <sub>2</sub> , C <sub>2</sub> H <sub>5</sub> CO <sub>3</sub> , CH <sub>3</sub> OH |

\* The modelled monoterpene concentration was halved to approximate the  $\alpha$ -pinene concentration (Rinne et al., 2002)

**Table S4 - Values of surface level CS and local time of run used for HOM altitude profiles (Lee et al., 2016)**

|                      | Location |        |                |
|----------------------|----------|--------|----------------|
|                      | Hyttiala | Manaus | Brent, Alabama |
| CS / s <sup>-1</sup> | 0.004    | 0.9    | 0.012 ± 0.006  |
| Local time           | 14:00    | 14:00  | 12:00          |

### Nucleation Parameterisations

The rates of neutral and ion-induced pure biogenic nucleation ( $J_n$  and  $J_{iin}$  respectively) are described by the parameterisations (Kirkby et al (2016)) in Eq. 4 and Eq. 5:

$$J_n = a_1[HOM]^{a_2 + \frac{a_5}{[HOM]}} \quad (4)$$

$$J_{iin} = a_3[HOM]^{a_4 + \frac{a_5}{[HOM]}}[n_{\pm}] \quad (5)$$

Where  $a_i$  are fitted parameters and  $[n_{\pm}]$  the concentration of ions calculated by method described Kirkby et al (2016). In this work, no distinction was made between the different HOM species; the  $[HOM]$  term was taken as the sum of all HOM species. In reality, the larger accretion products are likely to be better at nucleating due to their lower volatility and even among 10-carbon HOMs, more oxidised species will also be more proficient at new particle formation. The condensation sink for ions was calculated by summing over aerosol modes and (Eq. 6).

$$CS = \frac{2kT\mu}{\varepsilon} \sum (wd \times c) \times 10^6 \quad (6)$$

Where  $k$  is the Boltzmann constant,  $T$  temperature (in Kelvin),  $\mu = 1.2 \times 10^{-4} \text{ m}^2 \text{ V}^{-1} \text{ s}^{-1}$ ,  $\varepsilon = 1.6022 \times 10^{-19} \text{ C}$ ,  $wd$  is the wet diameter (in m) of the aerosol mode and  $c$  the mode's particle concentration (per cm<sup>3</sup>) ( $wd$  and  $c$  were taken from UKCA run).

The ion loss rate,  $X$ , was then calculated as the sum of the condensation and nucleation sinks (Eq. 7).

$$X = CS + a_3[HOM]^{a_4 + \frac{a_5}{[HOM]}} \quad (7)$$

The recombination coefficient,  $\alpha$ , is given by Eq. 8:

$$\alpha = 6 \times 10^{-8} \sqrt{\frac{300}{T}} + 6 \times 10^{-26} c_{air} \left( \frac{300}{T} \right)^4 \quad (8)$$

Where  $c_{air}$  is the concentration of air in molecules per cm<sup>3</sup>.

$$[n_{\pm}] = \frac{\sqrt{(X^2 - 4\alpha q)} - X}{2\alpha} \quad (9)$$

Where  $q$  is the rate of ion-pair production in cm<sup>-3</sup> s<sup>-1</sup>.

The sulphuric acid activation parameterisation used was that developed by Kulmala et al (2006) with coefficient from Sihto et al (2006) as used by Scott et al (2014) (Eq. 10).

$$J_{act} = A[H_2SO_4]$$

(10)

Where  $A=2 \times 10^{-6} \text{ s}^{-1}$

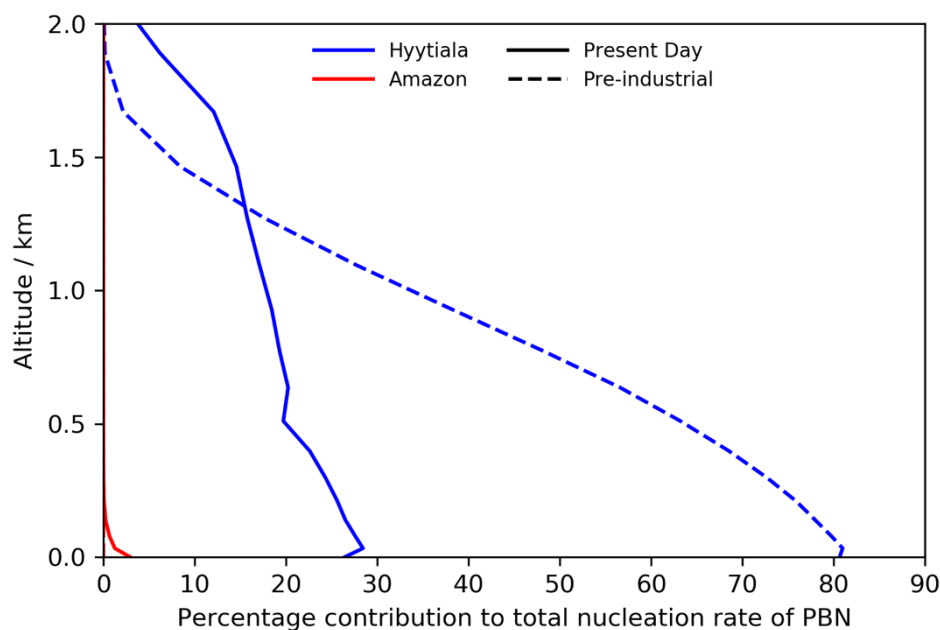

180 **Figure S24 – Percentage contribution to total nucleation rate (PBN +  $SA_{act}$ ) of PBN. Significant increase is predicted for the PI Hyytiala case in particular, indicating the important implications of including PBN in climate models.**

### Changes to CRI v2.2 R5 mechanism

Simple rate coefficients (e.g.  $k_{RO_2NO}$ ) and photolysis frequencies (e.g.  $J_{41}$ ) were taken from CRI (Jenkin et al., 2008, Jenkin  
 185 et al., 2019b). Unless otherwise stated, unimolecular rate coefficients have units of  $\text{s}^{-1}$ . The peroxy radical pools ( $RO_{2b}$ ,  $RO_{2m}$ ,  $RO_{2s}$  and  $RO_2$ ) represent the total concentration of peroxy radicals falling within the respective pool. In the mechanism used in modelling, certain reactions were lumped together with product fractions weighted by relative rate coefficients to reduce the total number of reactions. For clarity, reactions have been decomposed below. The autoxidation coefficients provided are those fitted at 297 K. Table S5 shows the expressions for the autoxidation coefficients in the 3 temperature dependent  
 190 mechanisms.

The standard reactions rate coefficients used by the CRI are as follows:

$$K_{RO_2NO} = 2.7D-12 * \text{EXP}(390/TEMP)$$

$$K_{RO_2HO_2} = 2.91D-13 * \text{EXP}(1300/TEMP)$$

$$K_{RO_2NO_3} = 2.3D-12$$

### 195 Reactions removed from CRI v2.2 R5 mechanism

#### Ozonolysis of alpha pinene and treatment of resulting peroxy radical RN18AO2

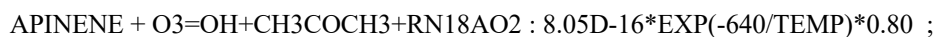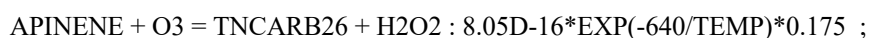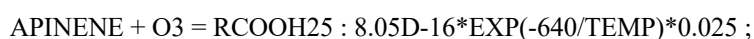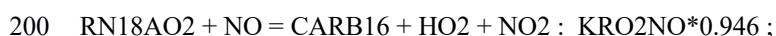

$\text{RN18AO2} + \text{NO} = \text{RN18NO3} : \text{KRO2NO} * 0.054 ;$

$\text{RN18AO2} + \text{NO3} = \text{CARB16} + \text{HO2} + \text{NO2} : \text{KRO2NO3} ;$

$\text{RN18AO2} + \text{HO2} = \text{RN18OOH} : \text{KRO2HO2} * 0.770 ;$

$\text{RN18AO2} = \text{CARB16} + \text{HO2} : 8.80\text{D-13} * \text{RO2} ;$

205 **OH oxidation of alpha pinene and treatment of resulting peroxy radical RTN28O2**

$\text{APINENE} + \text{OH} = \text{RTN28O2} : 1.20\text{D-11} * \text{EXP}(444/\text{TEMP}) ;$

$\text{RTN28O2} + \text{NO} = \text{TNCARB26} + \text{HO2} + \text{NO2} : \text{KRO2NO} * 0.767 * 0.915 ;$

$\text{RTN28O2} + \text{NO} = \text{CH3COCH3} + \text{RN19O2} + \text{NO2} : \text{KRO2NO} * 0.767 * 0.085 ;$

$\text{RTN28O2} + \text{NO} = \text{RTN28NO3} : \text{KRO2NO} * 0.233 ;$

210 **RTN28O2 + NO3 = TNCARB26 + HO2 + NO2 : KRO2NO3 ;**

$\text{RTN28O2} + \text{HO2} = \text{RTN28OOH} : \text{KRO2HO2} * 0.914 ;$

$\text{RTN28O2} = \text{TNCARB26} + \text{HO2} : 2.85\text{D-13} * \text{RO2} ;$

**Reactions added**

215 **Ozonolysis of  $\alpha$ -pinene producing 1st generation O3RO2, RN26BO2 - branching ratio set to 50% based on experimental observations of Berndt et al (2018b)**

1.  $\text{APINENE} + \text{O3} = 0.175\text{TNCARB26} + 0.025\text{RCOOH25} + 0.8\text{OH} + 0.5\text{RN26BO2} + 0.3\text{RTN24O2} : 8.05\text{E-16} * \text{EXP}(-640/\text{TEMP}) ;$

**Reactions of RN26BO2**

Reaction with HO2 forms hydroperoxide species already in CRI, not a HOM due to insufficient oxygens.

220 **2.  $\text{RN26BO2} + \text{HO2} = \text{RTN26OOH} : \text{KRO2HO2} * 0.9 ;$**

Reaction with NO, NO<sub>3</sub> forms next generation O3RO2 via alkoxy radical isomerisation and fragmentation products (smaller RO2, RN9O2, and closed shell species, CARB16) at 50:50 branching ratio). NO also forms small yield of RN18NO3, estimated from original CRI v2.2 R5.

3.  $\text{RN26BO2} + \text{NO} = 0.025\text{RTN28NO3} + 0.487\text{RN25BO2O2} + 0.487\text{CARB16} + 0.487\text{RN9O2} + 0.975\text{NO2} : \text{KRO2NO} ;$

225 **4.  $\text{RN26BO2} + \text{NO3} = 0.5\text{RN25BO2O2} + 0.5\text{CARB16} + 0.5\text{RN9O2} + \text{NO2} : \text{KRO2NO3} ;$**

**Autoxidation of RN26BO2 to 2nd generation O3RO2, RN25BO2O2**

5.  $\text{RN26BO2} = \text{RN25BO2O2} : 0.206 ;$



## Reactions of RN25BO2O2

230 Reaction with HO2 forms HOM monomer C10z as product has sufficient oxygens. Reaction with NO, NO3 follows the same principle as RN26BO2.

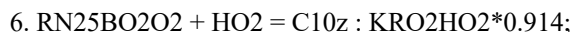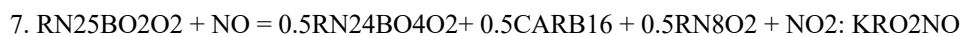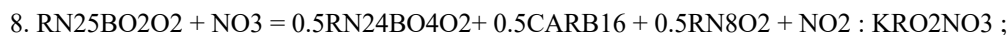

## Autoxidation of RN25BO2O2 to 3rd generation O3RO2, RN24BO4O2

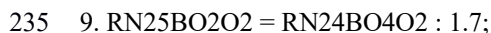

## Reactions of RN24BO4O2

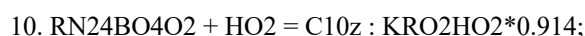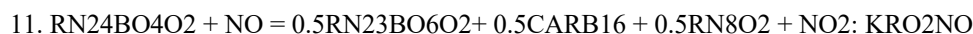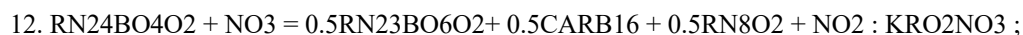

240 Autoxidation of RN24BO4O2 to 4th generation O3RO2, RN23BO6O2

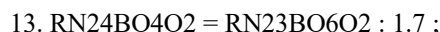

## Reactions of RN23BO6O2

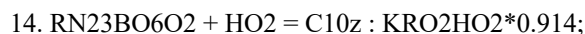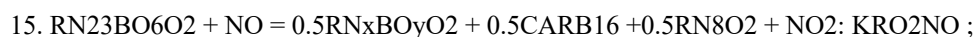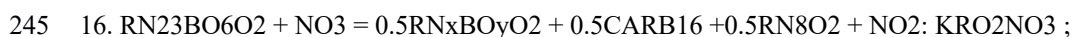

## Autoxidation of RN23BO6O2 to lumped “5th generation and higher” O3RO2, RNxBOyO2

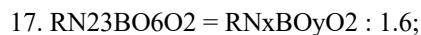

## Reactions of RNxBOyO2 - no further autoxidation

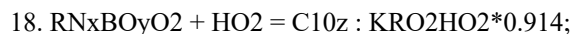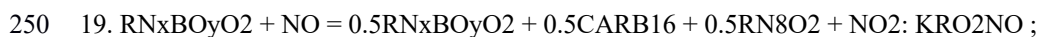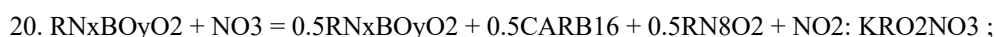

## Reactions of O3RO2 with big peroxy radical pool (RO2\_b)

All reactions with RO<sub>2b</sub> produce a 20-carbon accretion product at a rate coefficient from fitting to experimental data (Berndt et al., 2018b). Reactions also produce, with equal rate coefficients (from Molteni et al., 2019), closed shell species which are classified as HOMs for all cases (except for the reaction of RN26BO<sub>2</sub> which is not sufficiently oxidised) and alkoxy radicals which go on to react as previously described in this work.

21. RN26BO<sub>2</sub> = 0.5 C20d : 0.97E-11 RO<sub>2b</sub> ;
22. RN26BO<sub>2</sub> = 0.5TNCARB26 + 0.25RN25BO<sub>2</sub>O<sub>2</sub> + 0.25CARB16 + 0.25RN8O<sub>2</sub> : 3.36E-12\*RO<sub>2\_b</sub> ;
23. RN25BO<sub>2</sub>O<sub>2</sub> = 0.5 C20d : 2.5E-11 RO<sub>2b</sub> ;
24. RN25BO<sub>2</sub>O<sub>2</sub> = 0.5C10z + 0.25RN24BO<sub>4</sub>O<sub>2</sub> + 0.25CARB16 + 0.25RN8O<sub>2</sub> : 3.36E-12\*RO<sub>2\_b</sub> ;
25. RN24BO<sub>4</sub>O<sub>2</sub> = 0.5 C20d : 3.4E-11 RO<sub>2b</sub> ;
26. RN24BO<sub>4</sub>O<sub>2</sub> = C10z + 0.5 RN23BO<sub>6</sub>O<sub>2</sub> + 0.5 CARB16 + 0.5 RN8O<sub>2</sub> : 1.68E-12 RO<sub>2b</sub> ;
26. RN24BO<sub>4</sub>O<sub>2</sub> = 0.5C10z + 0.25RN23BO<sub>6</sub>O<sub>2</sub> + 0.25CARB16 + 0.25RN8O<sub>2</sub> : 3.36E-12\*RO<sub>2\_b</sub> ;
27. RN23BO<sub>6</sub>O<sub>2</sub> = 0.5 C20d : 3.6E-11 RO<sub>2b</sub> ;
28. RN23BO<sub>6</sub>O<sub>2</sub> = 0.5C10z + 0.25RN<sub>x</sub>BO<sub>y</sub>O<sub>2</sub> + 0.25CARB16 + 0.25RN8O<sub>2</sub> : 3.36E-12\*RO<sub>2\_b</sub> ;
29. RN<sub>x</sub>BO<sub>y</sub>O<sub>2</sub> = 0.5 C20d : 3.6E-11 RO<sub>2b</sub> ;
30. RN<sub>x</sub>BO<sub>y</sub>O<sub>2</sub> = 0.5C10z + 0.25RN<sub>x</sub>BO<sub>y</sub>O<sub>2</sub> + 0.25CARB16 + 0.25RN8O<sub>2</sub> : 3.36E-12\*RO<sub>2\_b</sub> ;

#### Reactions of O<sub>3</sub>RO<sub>2</sub> with medium and small peroxy radical pools (RO<sub>2m</sub> and RO<sub>2s</sub>)

Reaction of RN26BO<sub>2</sub> is based on corresponding species in MCM.

31. RN26BO<sub>2</sub> = 0.5RN25BO<sub>2</sub>O<sub>2</sub> + 0.5CARB16 + 0.5RN9O<sub>2</sub> : 8.13E-13 (RO<sub>2s</sub>+RO<sub>2m</sub>) ;
- Rate coefficient and branching ratios of later generation O<sub>3</sub>RO<sub>2</sub> with medium and small peroxy radical pools taken from Roldin et al (2019). The alkoxy radical produced goes on to react as described earlier in this work.
32. RN25BO<sub>2</sub>O<sub>2</sub> = 0.3RN24BO<sub>4</sub>O<sub>2</sub> + 0.3CARB16 + 0.3RN8O<sub>2</sub> + 0.4C10z : 5E-12 (RO<sub>2s</sub>+RO<sub>2m</sub>) ;
33. RN24BO<sub>4</sub>O<sub>2</sub> = 0.2RN23BO<sub>6</sub>O<sub>2</sub> + 0.2CARB16 + 0.2RN8O<sub>2</sub> + 0.6C10z : 7E-12 (RO<sub>2s</sub>+RO<sub>2m</sub>) ;
34. RN23BO<sub>6</sub>O<sub>2</sub> = 0.1RN<sub>x</sub>BO<sub>y</sub>O<sub>2</sub> + 0.1CARB16 + 0.1RN8O<sub>2</sub> + 0.8C10z : 9E-12 (RO<sub>2s</sub>+RO<sub>2m</sub>) ;
35. RN<sub>x</sub>BO<sub>y</sub>O<sub>2</sub> = 0.1RN<sub>x</sub>BO<sub>y</sub>O<sub>2</sub> + 0.1CARB16 + 0.1RN8O<sub>2</sub> + 0.8C10z : 1E-11 (RO<sub>2s</sub>+RO<sub>2m</sub>) ;

Rate coefficient of O3RO2 with isoprene-derived peroxy radical from fitting of model to experimental data (Berndt et al, 2018b).

36.  $RN26BO2 = 0.667C15d : 3.9E-12 RO2_m ;$

285 37.  $RN25BO2O2 = 0.667C15d : 5.2E-12 RO2_m ;$

38.  $RN24BO4O2 = 0.667C15d : 6.5E-12 RO2_m ;$

39.  $RN23BO6O2 = 0.667C15d : 6.5E-12 RO2_m ;$

40.  $RN_xBO_yO2 = 0.667C15d : 7.5E-12 RO2_m ;$

#### **OH oxidation of alpha pinene producing two OHRO2 - RTN28AO2 + RTN28BO2**

290 41.  $APINENE + OH = 0.78 RTN28AO2 + 0.22 RTN28BO2 : 1.20E-11 * EXP(440/TEMP);$

**Reactions of RTN28AO2 are the same as for RTN28O2 in original CRI v2.2 R5 except for accretion product formation. RTN28AO2 does not undergo autoxidation.**

42.  $RTN28AO2 + NO = 0.23RTN28NO3 + 0.77TNCARB26 + 0.77NO2 : 2.7D-12 * EXP(360/TEMP) * 0.767 ;$

43.  $RTN28AO2 + HO2 = RTN28OOH : 2.91D-13 * EXP(1300/TEMP) * 0.914 ;$

295 44.  $RTN28AO2 + NO3 = TNCARB26 + HO2 + NO2 : 2.3D-12 ;$

45.  $RTN28AO2 = TNCARB26 : 6.65E-13 * RO2 ;$

46.  $RTN28AO2 = 0.5 C20d : 0.4E-11 * RO2_b ;$

47.  $RTN28AO2 = 0.667C15d : 1.8E-12 * RO2_m ;$

#### **Reactions of RTN28BO2**

300 Reaction with HO2 forms hydroperoxide species already in CRI, not a HOM due to insufficient oxygens.

48.  $RTN28BO2 + HO2 = RTN28OOH : KRO2HO2 * 0.914 ;$

Reaction with NO, NO3 forms next generation OHRO2 via alkoxy radical isomerisation and fragmentation products (smaller RO2, RN9O2, and closed shell species, CARB16) at 50:50 branching ratio). NO also forms small yield of RN18NO3, estimated from original CRI v2.2 R5.

305 49.  $RTN28BO2 + NO = 0.125 * RTN28NO3 + 0.875CH3COCH3 + 0.875RN19O2 + 0.875NO2 : KRO2NO ;$

50.  $RTN28BO2 + NO3 = CH3COCH3 + RN17O2 + NO2 : KRO2NO3 ;$

#### **Autoxidation of RTN28BO2 to produce 2nd generation OHRO2, RTN27BO2O2**

51.  $RTN28BO2 = RTN27BO2O2 : 2.1 ;$

## Reactions of RTN27BO2O2

310 Reaction with HO2 forms hydroperoxide species already in CRI, not a HOM due to insufficient oxygens.

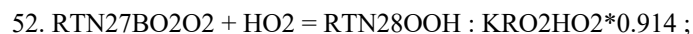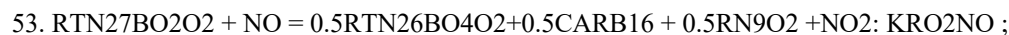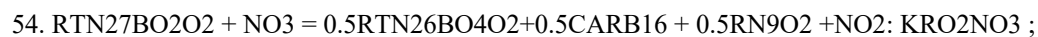

## Autoxidation of RTN27BO2O2 to produce 3rd generation OHRO2, RTN26BO4O2

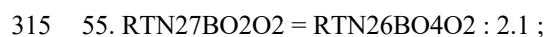

## Reactions of RTN26BO4O2

Hydroperoxide from RTN26BO4O2 has sufficient oxygens to be classified as a HOM.

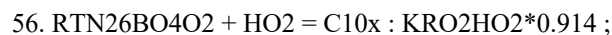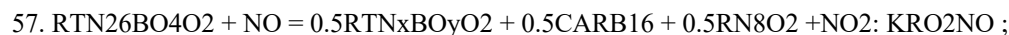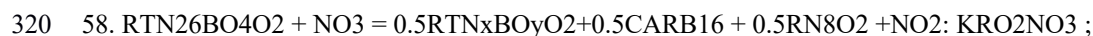

## Autoxidation of RTN26BO4O2 to produce “4th generation and higher” OHRO2, RTNxBOyO2

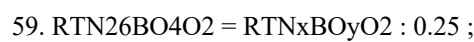

## Reactions of RTNxBOyO2 - no further autoxidation occurs

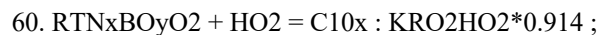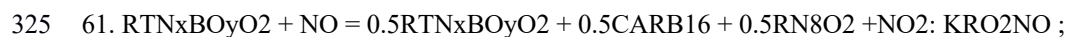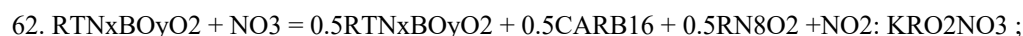

## Reactions of OHRO2 with big peroxy radical pool (RO2<sub>b</sub>)

Rate coefficient from fitting of model to experimental data (Berndt et al, 2018b).

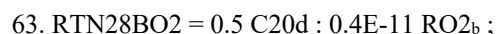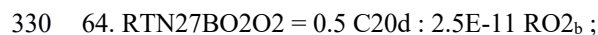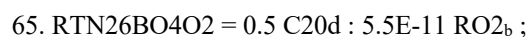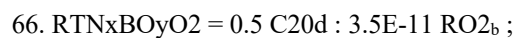

## Reactions of OHRO2 with medium, small and total peroxy radical pools (RO2<sub>m</sub>, RO2<sub>s</sub> and RO2)

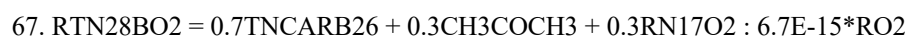

335 68.  $RTN27BO2O2 = 0.4TNCARB26 + 0.3RTN26BO4O2 + 0.3CARB16 + 0.3RN10O2 : 5E-12*RO2 ;$

69.  $RTN26BO4O2 = 0.4C10x + 0.3RTNxBOyO2 + 0.3CARB16 + 0.3RN9O2 : 8E-12*RO2 ;$

70.  $RTNxBOyO2 = 0.8C10x + 0.1RTNxBOyO2 + 0.1CARB16 + 0.1RN8O2 : 1E-11*RO2 ;$

Rate coefficient of OHRO2 with isoprene-derived peroxy radical from fitting of model to experimental data (Berndt et al, 2018b).

340 71.  $RTN28BO2 = 0.667C15d : 1.8E-12 RO2_m ;$

72.  $RTN27BO2O2 = 0.667C15d : 3.75E-12 RO2_m ;$

73.  $RTN26BO4O2 = 0.667C15d : 3.75E-12 RO2_m ;$

74.  $RTNxBOyO2 = 0.667C15d : 3.75E-12 RO2_m ;$

### Photolysis of HOMs

345 Photolysis of peroxide linkage and carbonyl linkages were considered using MCM frequencies J41 and J22 respectively. The KPP parameter “SUN” was used in experiments where the photolysis frequency was varied.

Photolysis of peroxide linkage in HOM monomer produces one OH and one alkoxy radical which behaves as previously discussed (50% decomposition, 50% isomerisation). As the extent of oxidation of the HOM is unknown, isomerisation produces second generation peroxy radical by default.

350 75.  $C10z = 0.5CARB16 + 0.5RN9O2 + 0.5RN25BO2O2 + OH : J41;$

76.  $C10x = 0.5CARB16 + 0.5RN9O2 + 0.5RTN27BO2O2 + OH : J41;$

Photolysis of C20d produces two alkoxy radicals. The isomerisation products are 2nd gen OHRO2 and 2nd gen O3RO2.

77.  $C20d = 0.5RN25BO2O2 + 0.5RTN27BO2O2 + RN9O2 + CARB16 : J41;$

355 Photolysis of C15d produces two alkoxy radicals. The isoprene-derived alkoxy radical produces UCARB12 (as inCRI v2.2 R5) while the alkoxy radical from alpha pinene forms next generation peroxy radicals via isomerisation (50 % OHRO2 and 50% O3RO2) and fragmentation products.

78.  $C15d = UCARB12 + 0.25RN25BO2O2 + 0.25RTN27BO2O2 + 0.5RN9O2 + 0.5CARB16 : J41;$

Photolysis of carbonyl linkage produces an acyl radical and an alkyl radical which will form peroxy radicals. It is assumed that one of these peroxy radicals is big enough to be considered (2nd generation) O3RO2 or OHRO2

360 79.  $C10z = RN25BO2O2 : J22;$

80.  $C10x = RTN27BO2O2 : J22;$

81.  $C20d = RN25BO2O2 + RTN27BO2O2 : J22;$

For C15d, one of the two peroxy radicals formed is assumed to be of medium size and produce UCARB12 which isomerisation (as occurs for isoprene-derived peroxy radicals).

365 82. C15d = 0.5RN25BO2O2 + 0.5RTN27BO2O2 + UCARB12: J22;

### HOM loss to OH

All HOM species are lost to OH with same rate coefficient as that for large hydroperoxide RTN28OOH in CRI v2.2 R5. The products, closed shell CRI species CARB10 and CARB15, were chosen under the assumption that the HOM fragments and the sum of CRI indices of the product is close to the CRI index of the peroxy radical which formed the HOM (23-27). The  
370 reaction of C15d also produces a product featured in the oxidation pathway of isoprene, UCARB10.

83. C10z + OH = CARB10 + CARB15 + OH : 2.38E-11 ;

84. C10x + OH = CARB10 + CARB15 + OH : 2.38E-11 ;

85. C15d + OH = CARB10 + CARB15 + UCARB10+ OH : 2.38E-11 ;

86. C20d + OH = 2CARB10 + 2CARB15 + OH : 2.38E-11 ;

375

**Table S5 - Temperature dependencies used for 3 temperature dependent mechanism versions.**

| Species    | HOM <sub>6000</sub>  | HOM <sub>9000</sub>   | HOM <sub>12077</sub>    |
|------------|----------------------|-----------------------|-------------------------|
| RN26BO2    | 1.223E8*EXP(-6000/T) | 2.981E12*EXP(-9000/T) | 9.413E16*EXP(-12077/T)  |
| RN25BO2O2  | 1.009E9*EXP(-6000/T) | 2.460E13*EXP(-9000/T) | 7.768E17*EXP(-12077/T)  |
| RN24BO4O2  | 1.009E9*EXP(-6000/T) | 2.460E13*EXP(-9000/T) | 7.768 E17*EXP(-12077/T) |
| RN23BO6O2  | 9.500E8*EXP(-6000/T) | 2.315E13*EXP(-9000/T) | 7.311E17*EXP(-12077/T)  |
| RTN28BO2   | 1.247E9*EXP(-6000/T) | 3.038E13*EXP(-9000/T) | 9.595E17*EXP(-12077/T)  |
| RTN27BO2O2 | 1.247E9*EXP(-6000/T) | 3.038E13*EXP(-9000/T) | 9.595E17*EXP(-12077/T)  |
| RTN26BO4O2 | 1.484E8*EXP(-6000/T) | 3.617E12*EXP(-9000/T) | 1.142E17*EXP(-12077/T)  |

The uncertainty in the autoxidation coefficients was estimated by further box models simulations where an autoxidation coefficient was adjusted so that the corresponding species was simulated at the upper and lower concentrations values given  
380 the experimental uncertainty.

**Table S6 – References for model parameters and confidence**

| Parameter | Value(s) | Source | Confidence |
|-----------|----------|--------|------------|
|-----------|----------|--------|------------|

| Autoxidation Coefficients                                                                                         | Detailed in Table 4                                                            | Derived in this work*                                                                                        | Estimated uncertainty in Table 4                                                                                                                                                                                                                                                                                                                                                                                             |
|-------------------------------------------------------------------------------------------------------------------|--------------------------------------------------------------------------------|--------------------------------------------------------------------------------------------------------------|------------------------------------------------------------------------------------------------------------------------------------------------------------------------------------------------------------------------------------------------------------------------------------------------------------------------------------------------------------------------------------------------------------------------------|
| Rate coefficients for C20d formation (k13)                                                                        | Section 2.3.1 and SI reaction list: 21, 23, 25, 27, 29, 46, 63, 64, 65, 66     | Derived in this work                                                                                         | Sensitivity tests suggested uncertainty range of +100% / - 35% (scalings of 0.65-2)                                                                                                                                                                                                                                                                                                                                          |
| Rate coefficients for C15d formation (k16)                                                                        | Section 2.3.2 and SI reaction list: 36, 37, 38, 39, 40, 47, 71, 72, 73, 74     | Derived in this work                                                                                         | Sensitivity tests suggested uncertainty range of $\pm 50\%$ (scalings of 0.5-1.5)                                                                                                                                                                                                                                                                                                                                            |
| Closed Shell / Alkoxy radical from a specific big RO <sub>2</sub> reacting with RO <sub>2</sub> b pool (k14, k15) | Section 2.3.1 and SI reaction list: 22, 24, 26, 28, 30, 32-35                  | Molteni et al (2019), Roldin et al (2019)                                                                    | Scaling by factors of 10 and 0.1 did not affect rate coefficients fitted for autoxidation or accretion product formation. HOM yield greater sensitivity with universal scalings of +100% and -50% resulting in a doubling and halving of HOM yield respectively.                                                                                                                                                             |
| k14/k15 branching ratio                                                                                           | 50:50                                                                          | Ratio similar to Jenkin et al (2019a) values of 40:60 (1°, 2° RO <sub>2</sub> ), 20:80 (3° RO <sub>2</sub> ) | Sensitivity tests with ratios of 40:60 and 20:80 did not affect rate coefficients fitted for autoxidation or accretion product formation and had minor effects on HOM yield.                                                                                                                                                                                                                                                 |
| HOM + OH rate coefficient                                                                                         | $2.38 \times 10^{-11}$ molecules <sup>-1</sup> cm <sup>3</sup> s <sup>-1</sup> | Based on comparable species in CRI v2.2, RTN28OOH                                                            | Increasing rate coefficient to collision limit (as suggested by Bianchi et al., 2019) had negligible affect                                                                                                                                                                                                                                                                                                                  |
| Alkoxy radical decomposition-isomerisation branching ratio                                                        | 50:50                                                                          | Estimate                                                                                                     | <u>Sensitivity tests with ratios of 75:25 and 25:75 did not affect rate coefficients fitted for autoxidation or accretion product formation.</u><br>HOM yield below 200 ppt NO <sub>x</sub> was unaffected and at 2 ppb NO <sub>x</sub> , uncertainty in autoxidation temperature dependence dwarfed this uncertainty. Ratio more important at higher NO <sub>x</sub> but this coincided with drastically reduced HOM yield. |

\*Note that the autoxidation rate coefficient for the 1<sup>st</sup> generation species RTN28BO2 was taken from Xu et al (2018)

385

## Breakdown of Peroxy Radical Pools In CRI-HOM

### Large Peroxy Radical Pool (8 or more carbons)

RTN28AO2, RTN28BO2, RTN27BO2O2, RTN26BO4O2, RTNxBOyO2, RN26BO2, RTN24O2, RN25BO2O2,  
RN24BO4O2, RN23BO6O2, RNxBOnO2, NRTN28O2, RA19CO2, RTX28O2, NRTX28O2, RTN26O2, RTN25O2,  
390 RTX22O2, RTN24O2, RTN23O2

#### Medium Peroxy Radical Pool (4-7 carbons)

RU12O2, NRU12O2, RN13O2, RN12O2, NRN12O2, RA13O2, DHPR12O2, RN11O2, RA16O2, RU10O2, RU10AO2,  
MACO3, RN13AO2, RU12O2, NRU12O2, RTN14O2, RN16AO2, RN14O2, RTN10O2, RN17O2, RN15AO2, RN15O2,  
RN18AO2, RN16O2, RN18O2, RN19O2

#### 395 Small Peroxy Radical Pool (3 or fewer carbons)

CH3O2, C2H5O2, HOCH2CH2O2, CH3CO3, C2H5CO3, ICH3H7O2, RN10O2, HOCH2CO3, NRN6O2, RN9O2, NRN9O2,  
RN8O2

#### References

Bates, K. H. and Jacob, D. J.: A new model mechanism for atmospheric oxidation of isoprene: global effects on oxidants,  
400 nitrogen oxides, organic products, and secondary organic aerosol, Atmos. Chem. Phys., 19, 9613–9640, doi.org/10.5194/acp-  
19-9613-2019, 2019.

Berndt, T., Mentler, B., Scholz, W., Fischer, L., Herrmann, H., Kulmala, M. and Hansel, A.: Accretion product formation from  
ozonolysis and OH radical reaction of  $\alpha$ -pinene: mechanistic insight and the influence of isoprene and ethylene. Environmental  
405 science & technology, 52,11069-11077, [doi.org/10.1021/acs.est.8b02210](https://doi.org/10.1021/acs.est.8b02210), 2018b.

Jenkin, M. E., Valorso, R., Aumont, B., and Rickard, A. R.: Estimation of rate coefficients and branching ratios for reactions  
of organic peroxy radicals for use in automated mechanism construction, Atmos. Chem. Phys., 19, 7691–7717,  
doi.org/10.5194/acp-19-7691-2019, 2019a.

410 Lee, S.H., Uin, J., Guenther, A.B., de Gouw, J.A., Yu, F., Nadykto, A.B., Herb, J., Ng, N.L., Koss, A., Brune, W.H. and  
Baumann, K.: Isoprene suppression of new particle formation: Potential mechanisms and implications. Journal of Geophysical  
Research: Atmospheres, 121,14-621, doi.org/10.1002/2016JD024844, 2016.

415 Molteni, U., Simon, M., Heinritzi, M., Hoyle, C.R., Bernhammer, A.K., Bianchi, F., Breitenlechner, M., Brilke, S., Dias, A.,  
Duplissy, J. and Frege, C.: Formation of Highly Oxygenated Organic Molecules from  $\alpha$ -Pinene Ozonolysis: Chemical  
Characteristics, Mechanism, and Kinetic Model Development. ACS Earth and Space Chemistry, 3, 873-  
883,doi.org/10.1021/acsearthspacechem.9b00035, 2019.

420 Rinne, H.J.I., Guenther, A.B., Greenberg, J.P. and Harley, P.C.: Isoprene and monoterpene fluxes measured above Amazonian  
rainforest and their dependence on light and temperature. Atmos Env, 36, 2421-2426. doi.org/10.1016/S1352-2310(01)00523-  
4, 2002

Roldin, P., Ehn, M., Kurtén, T., Olenius, T., Rissanen, M.P., Sarnela, N., Elm, J., Rantala, P., Hao, L., Hyttinen, N. and  
425 Heikkinen, L.: The role of highly oxygenated organic molecules in the Boreal aerosol-cloud-climate system. Nature  
communications, 10, 1-15, doi.org/10.1038/s41467-019-12338-8, 2019.



Scott, C. E., Rap, A., Spracklen, D. V., Forster, P. M., Carslaw, K. S., Mann, G. W., Pringle, K. J., Kivekäs, N., Kulmala, M., Lihavainen, H., and Tunved, P.: The direct and indirect radiative effects of biogenic secondary organic aerosol, *Atmos. Chem. Phys.*, 14, 447–470, doi.org/10.5194/acp-14-447-2014, 2014.

Sihto, S.-L., Kulmala, M., Kerminen, V.-M., Dal Maso, M., Petäjä, T., Riipinen, I., Korhonen, H., Arnold, F., Janson, R., Boy, M., Laaksonen, A., and Lehtinen, K. E. J.: Atmospheric sulphuric acid and aerosol formation: implications from atmospheric measurements for nucleation and early growth mechanisms, *Atmos. Chem. Phys.*, 6, 4079–4091, doi:10.5194/acp-6-4079-2006, 2006.

Xu, L., Møller, K.H., Crounse, J.D., Otkjær, R.V., Kjaergaard, H.G. and Wennberg, P.O.: Unimolecular reactions of peroxy radicals formed in the oxidation of  $\alpha$ -pinene and  $\beta$ -pinene by hydroxyl radicals. *The Journal of Physical Chemistry A*, 123, 1661-1674, doi.org/10.1021/acs.jpca.8b11726, 2019.
